# Supplementary material for: Preparation of polysulfone-based PANI–TiO2 nanocomposite hollow fiber membranes for industrial dye rejection applications
Source: Royal Society of Chemistry journal article supplement (doi:10.1039/c6ra18682c), 2016-01-01
Supplement: c6ra18682c1.pdf [file c6ra18682c1.pdf]

## PREPARATION OF POLYSULFONE BASED PANI-TiO<sub>2</sub> NANOCOMPOSITE HOLLOW FIBER MEMBRANES FOR INDUSTRIAL DYE REJECTION APPLICATION

### Supporting Information

#### S1 Spinning conditions for hollow fiber membranes

|                               |                                                      |
|-------------------------------|------------------------------------------------------|
| Dope composition              | PSf/PANI-TiO <sub>2</sub> /NMP<br>PSf/NMP (For Neat) |
| Dope Extrusion Rate (DER)     | 5 mL/min                                             |
| Bore fluid                    | Distilled water                                      |
| Bore Extrusion Rate (BER)     | 5/4 mL/min                                           |
| Air gap                       | 5 cm and 10 cm                                       |
| Spinneret Dimension (o.d/i.d) | 1.15/0.55 (mm)                                       |

#### S2 Viscosity of dope solutions

| Dope solutions of | Viscosity (mPas) |
|-------------------|------------------|
| P-A, P-B          | 1661.9           |
| P-0.5-A, P-0.5-B  | 1752.4           |
| P-1.0-A, P-1.0-B  | 1876.5           |

#### S3

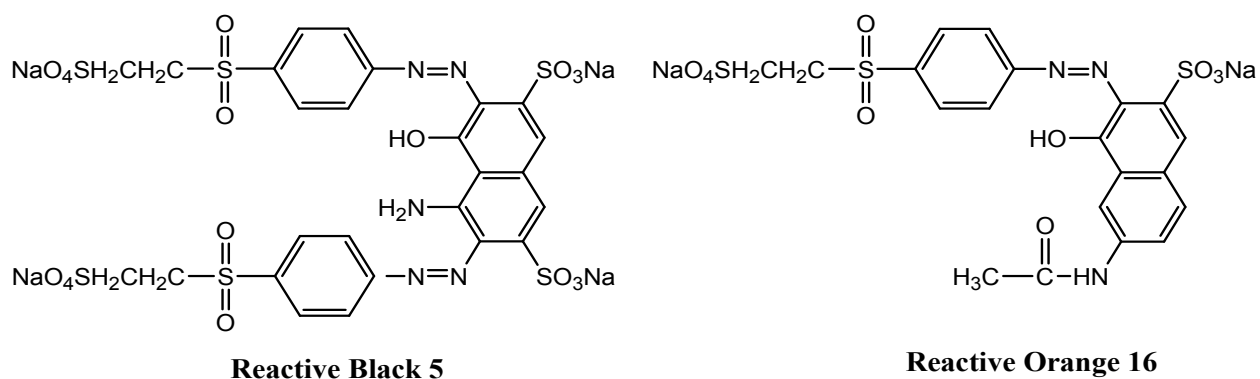

Structures of Reactive Black 5 and Reactive Orange 16

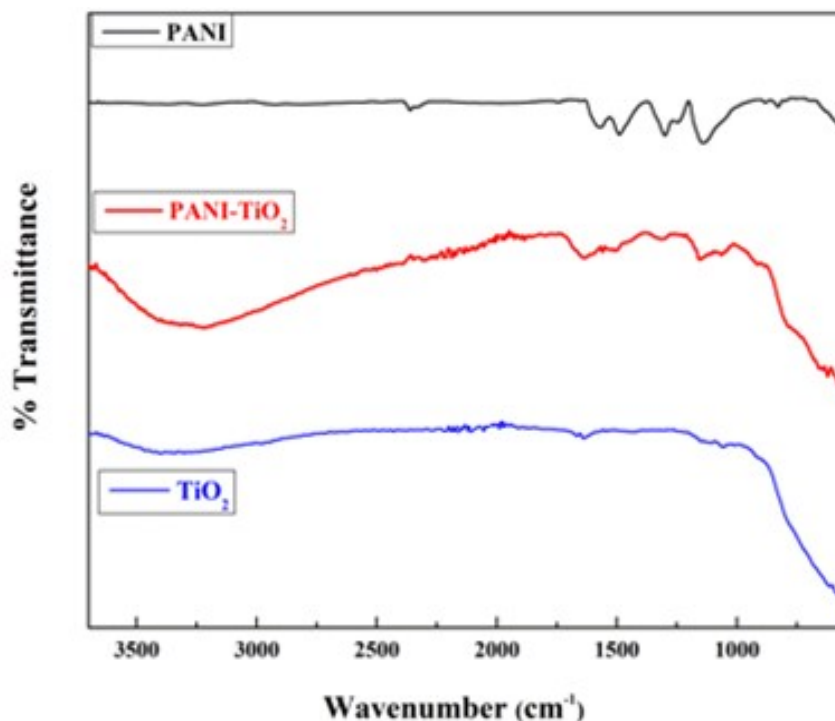

FTIR spectra of PANI, PANI-TiO<sub>2</sub> and TiO<sub>2</sub>

A broad peak observed around 3400 cm<sup>-1</sup> in TiO<sub>2</sub>, which can be ascribed to the stretching vibration of -OH group and a minor peak at 1638 cm<sup>-1</sup> is attributed to the adsorbed water on TiO<sub>2</sub>.<sup>1</sup> Broad peak range of 1000 to 550 cm<sup>-1</sup> can be ascribed to the Ti-O-Ti bonds.

Pure PANI exhibits peaks at 1567 cm<sup>-1</sup> and 1487 cm<sup>-1</sup>. These are attributed to the C=N and C=C stretching vibrations of quinoid and benzenoid rings of PANI respectively. The C-N stretching mode of benzenoid ring gave peaks at 1298 cm<sup>-1</sup> and 1246 cm<sup>-1</sup>. Further peaks observed at 1141 cm<sup>-1</sup> and 812 cm<sup>-1</sup> can be attributed to the C-H in plane and out of plane bending vibrations respectively.<sup>2</sup> The peaks present in pure PANI and pure TiO<sub>2</sub> were also observed in PANI-TiO<sub>2</sub> nanocomposite as shown in the above figure.

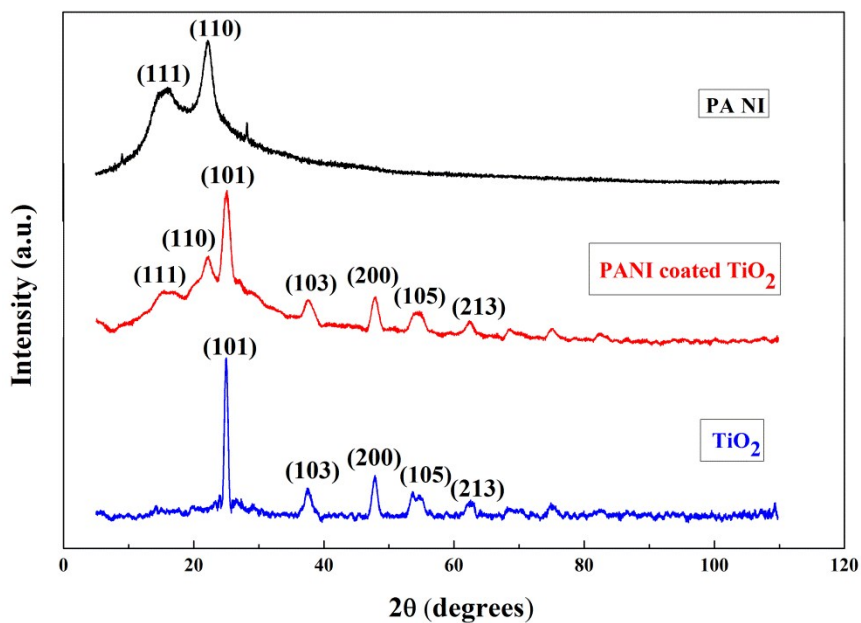

X-Ray Diffraction patterns of pure PANI, PANI coated TiO<sub>2</sub> and pure TiO<sub>2</sub>

Two broad peaks at  $2\theta=17^\circ$  and  $23^\circ$  correspond to the (111) and (110) planes in PANI. Pure TiO<sub>2</sub> exhibits sharp peaks at  $25.3^\circ$ ,  $37.8^\circ$ ,  $48.1^\circ$ ,  $54.6^\circ$  and  $62.6^\circ$  with respect to the planes (101), (103), (200), (105) and (213) of anatase phase of TiO<sub>2</sub><sup>3,4</sup>. The PANI-TiO<sub>2</sub> nanocomposite exhibited the peaks at  $17^\circ$  and  $23^\circ$  due to PANI, also including all the peaks of TiO<sub>2</sub>, confirming the presence of PANI coating on TiO<sub>2</sub> nanotubes.

**Comparison with the reported data**

| Literature     | Work                                                                                               | For membranes containing 1.0 wt.% of PANI-TiO <sub>2</sub> |                |                |                         |                                                                                            | Reference |
|----------------|----------------------------------------------------------------------------------------------------|------------------------------------------------------------|----------------|----------------|-------------------------|--------------------------------------------------------------------------------------------|-----------|
|                |                                                                                                    | % FRR                                                      | BSA Rejection  | Pore size (nm) | Contact Angle (degrees) | Application                                                                                |           |
| Pereira et al. | PSf flat sheet membranes containing PANI coated TiO <sub>2</sub> nanotubes with PEG as pore former | 83%                                                        | Not Applicable | 10.72          | 64.0                    | Potentially toxic metal ion rejection for metal ions Cd <sup>2+</sup> and Pb <sup>2+</sup> | 5         |
| Teli et al.    | PSf flat sheet membranes containing PANI coated TiO <sub>2</sub> nanoparticles                     | 79%                                                        | 95-99%         | 8.11           | 52.0                    | Not Applicable                                                                             | 6         |
| Current work   | PSf hollow fiber membranes containing PANI coated TiO <sub>2</sub> nanotubes                       | 90.03%                                                     | 99.9%          | 1.88           | 72.8                    | Rejection study of Reactive Black-5 and Reactive Orange-16                                 |           |

Comparison of Pure Water Flux of membranes with reported literature

| PANI-TiO <sub>2</sub> composition | Pure water flux in L/m <sup>2</sup> /h at 0.2 MPa |             |              |
|-----------------------------------|---------------------------------------------------|-------------|--------------|
|                                   | Pereira et al.                                    | Teli et al. | Current work |
| Neat PSf                          | 18.69                                             | 72          | 65.12        |
| 0.5 Wt. %                         | 20.56                                             | -           | 49.82        |
| 1.0 wt. %                         | 65.76                                             | 170         | 27.48        |

S7

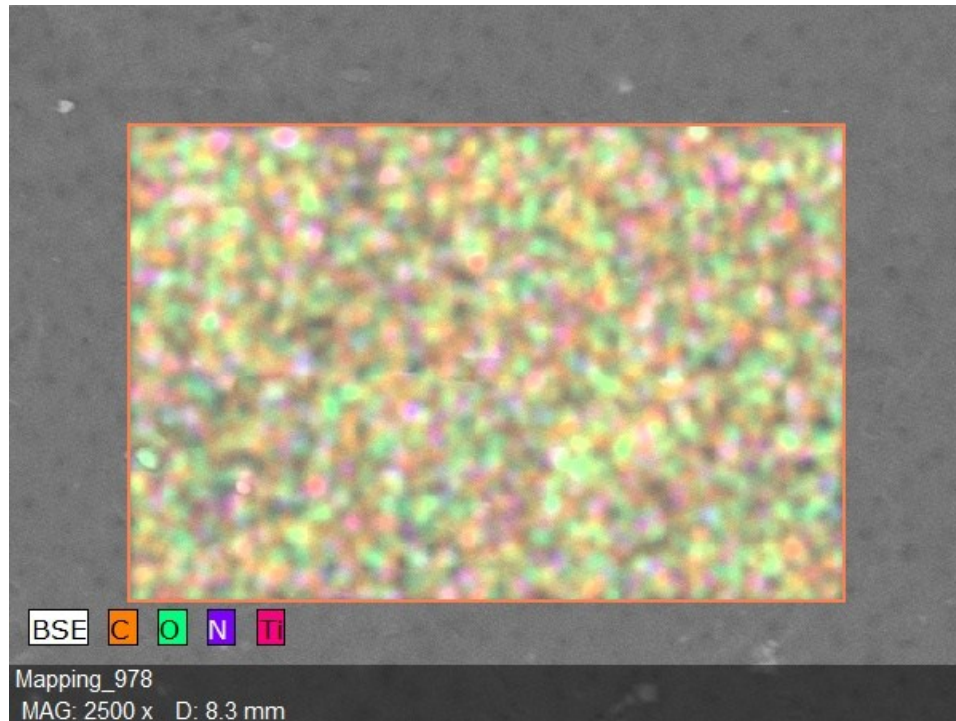

Elemental mapping on P-0.5-A membrane showing uniform distribution of titania

S8

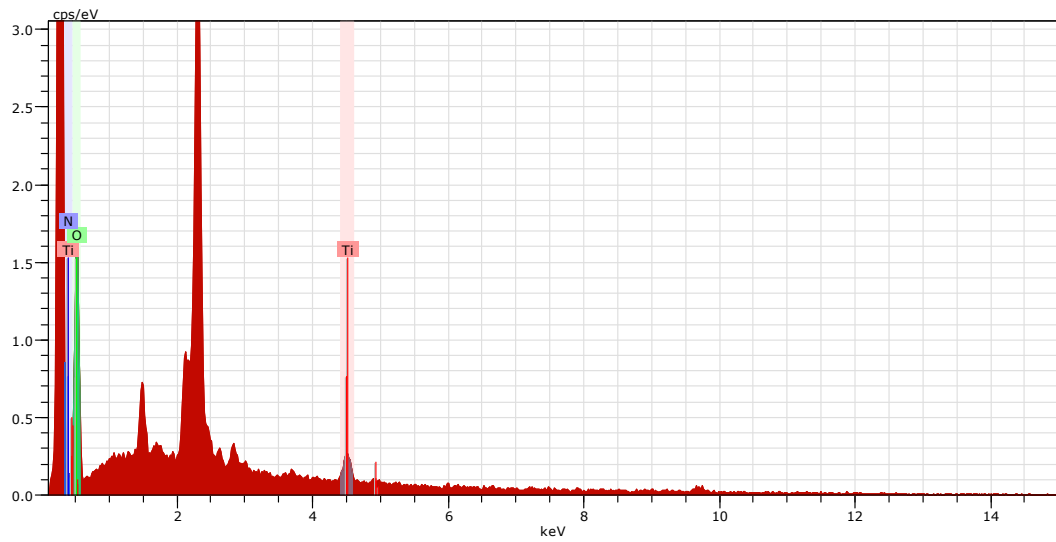

EDX of P-1.0-B membrane

S9

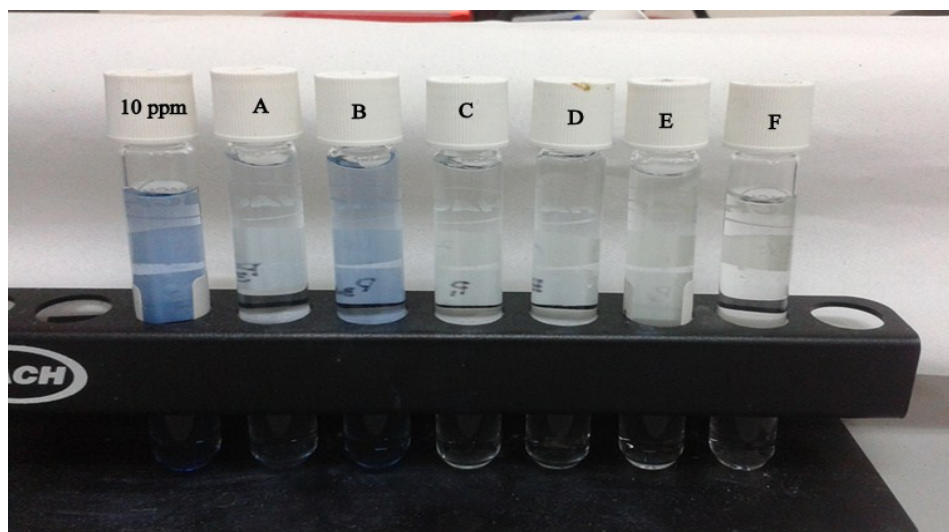

Images showing rejection of Reactive Black 5 by membranes A) P-A B) P-B C) P-0.5-A  
D) P-0.5-B E) P-1.0-A F) P-1.0-B

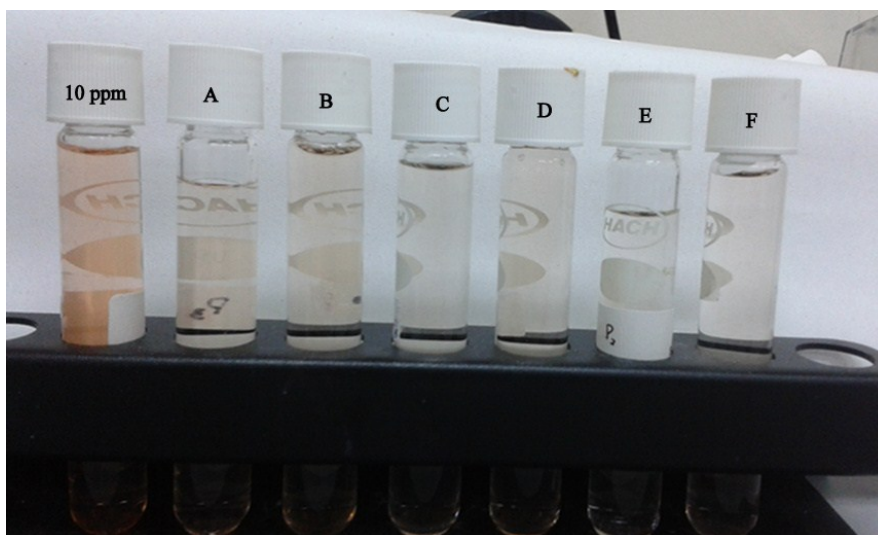

Images showing rejection of Reactive Orange 16 by membranes A) P-A B) P-B C) P-0.5-  
A D) P-0.5-B E) P-1.0-A F) P-1.0-B

## References

1. F. Cheng, S. M. Sajedin, S. M. Kelly, A. F. Lee and A. Kornherr, *Carbohydr. Polym.*, 2014, **114**, 246-252.
2. V. R. Pereira, A. M. Isloor, U. K. Bhat and A. F. Ismail, *Desalination*, 2014, **351**, 220-227.
3. Y. Li, Y. Yu, L. Wu and J. Zhi, *Appl. Surf. Sci.*, 2013, **273**, 135-143.

4. S. Nasirian and H. Milani Moghaddam, *Int. J. Hydrogen Energy*, 2014, **39**, 630-642.
5. V. R. Pereira, A. M. Isloor, A. Al Ahmed and A. Ismail, *New J. Chem.*, 2015, **39**, 703-712.
6. S. B. Teli, S. Molina, A. Sotto, E. G. a. Calvo and J. d. Abajob, *Ind. Eng. Chem. Res.*, 2013, **52**, 9470-9479.
